# Supplementary material
Source: Springer Nature journal article supplement (https://www.springerprofessional.de/resource/supplementary/13638_2013_1028_MOESM2_ESM.pdf/11899114)

$$\gamma_{\text{edge}} = 0 \text{ dB}, D_{\text{edge}} = 1000 \text{ m}$$

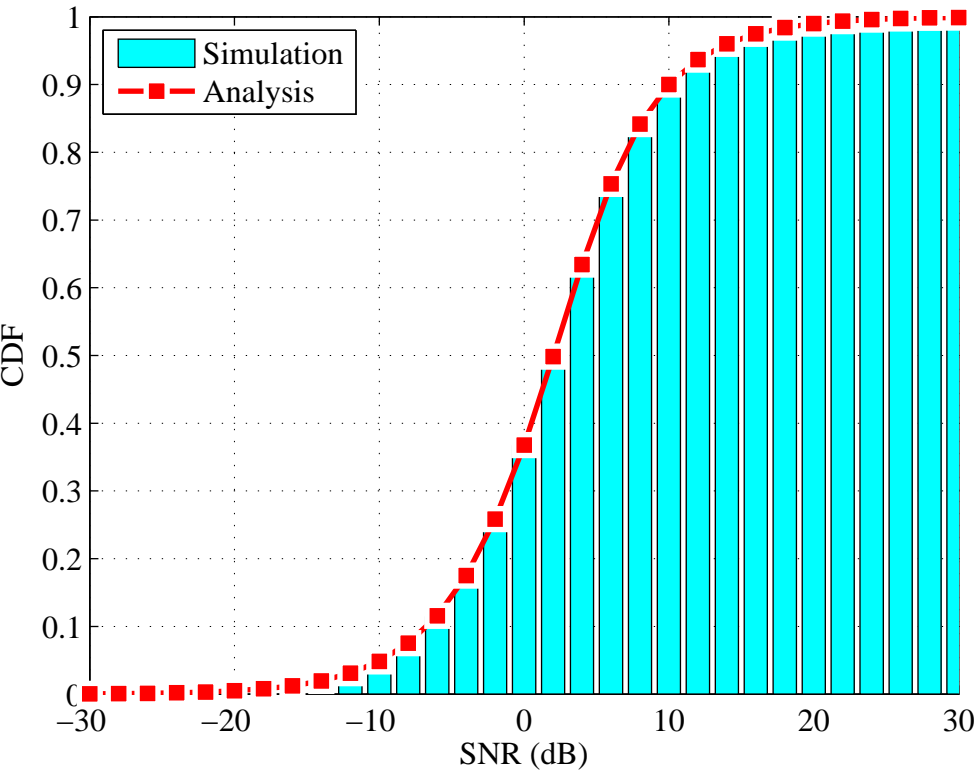

Supplement: MOESM2 [file 11899114]
